# Supplementary material for: A heterometallic ferrimagnet based on a new TTF-bis(oxamato) ligand
Source: Royal Society of Chemistry journal article supplement (doi:10.1039/c6dt04903f), 2017-01-01
Supplement: c6dt04903f1.pdf [file c6dt04903f1.pdf]

**A heterometallic ferrimagnet based on the new TTF-bis(oxamato)  
ligand**

Long Cui<sup>†</sup>, Jing-yuan Ge<sup>†</sup>, Chanel F. Leong,<sup>‡</sup> Deanna M. D'Alessandro,<sup>‡</sup> and Jing-Lin  
Zuo<sup>\*†</sup>

<sup>†</sup> State Key Laboratory of Coordination Chemistry, School of Chemistry and Chemical  
Engineering, Collaborative Innovation Center of Advanced Microstructures, Nanjing  
University, Nanjing 210093, P. R. China

<sup>‡</sup> School of Chemistry, The University of Sydney, New South Wales 2006, Australia

---

\* To whom correspondence should be addressed. Email: [zuojl@nju.edu.cn](mailto:zuojl@nju.edu.cn); Fax: +86-25-89682309.

Nanjing University.

## Caption of Content

1. **Figure S1.** View of the crystal packing arrangement of complex **1**. The dashed lines represent the C–H···O nonclassical hydrogen bonds.
2. **Figure S2.** The XRPD patterns (red lines) obtained from the as-synthesized solids of **2** and the simulated XRPD patterns (black lines) from single crystals of **2**.
3. **Figure S3.** Plot of  $1/\chi_M$  vs  $T$  for **2**. The red solid line is the fitting result by Curie-Weiss Law.
4. **Figure S4.** Temperature-dependent in-phase  $\chi'$  and out-of-phase  $\chi''$  ac susceptibility signals for **2** at the frequency of 999 Hz under zero dc field.

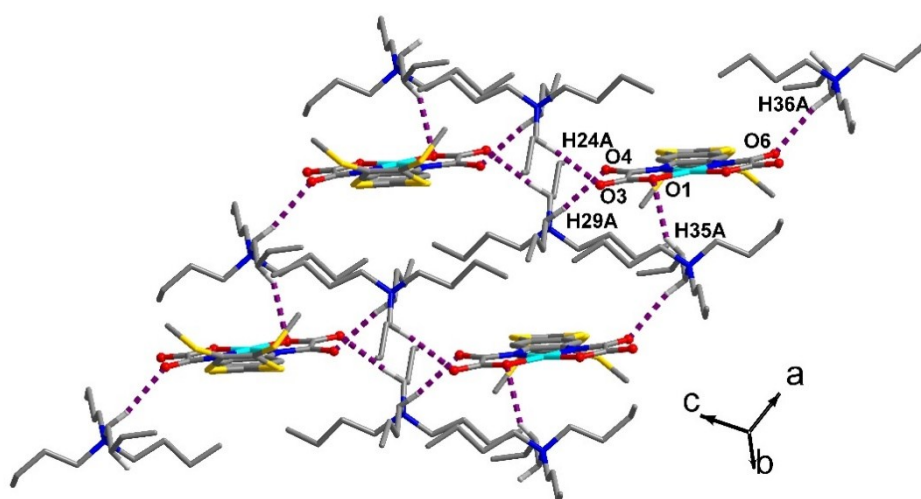

**Figure S1.** View of the crystal packing arrangement of complex **1**. The dashed lines represent the C–H···O nonclassical hydrogen bonds.

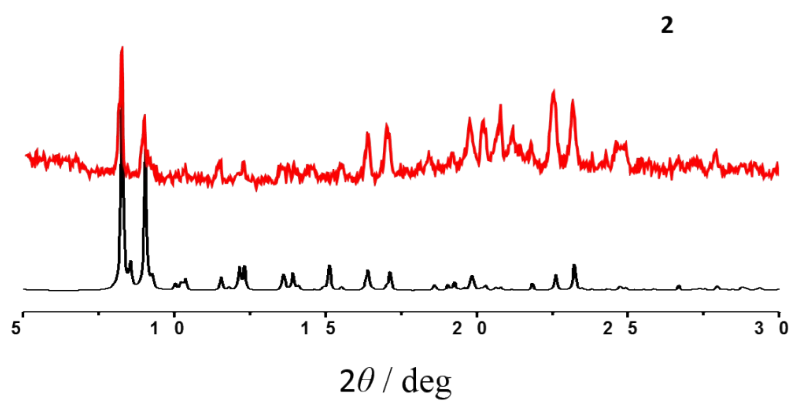

**Figure S2.** The XRPD patterns (red lines) obtained from the as-synthesized solids of **2** and the simulated XRPD patterns (black lines) from single crystals of **2**.

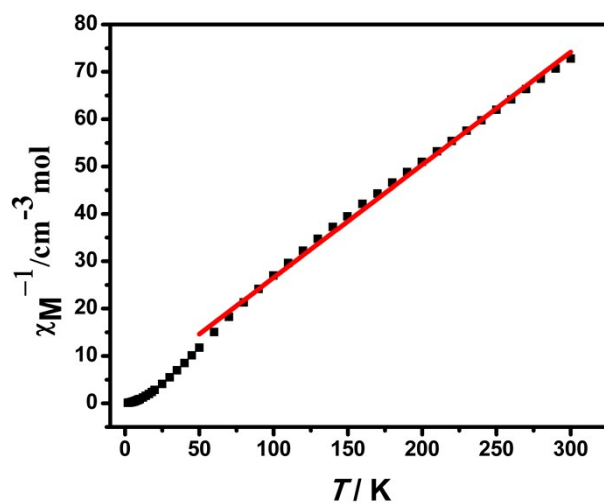

**Figure S3.** Plot of  $1/\chi_M$  vs  $T$  for **2**. The red solid line is the fitting result by Curie-Weiss Law.

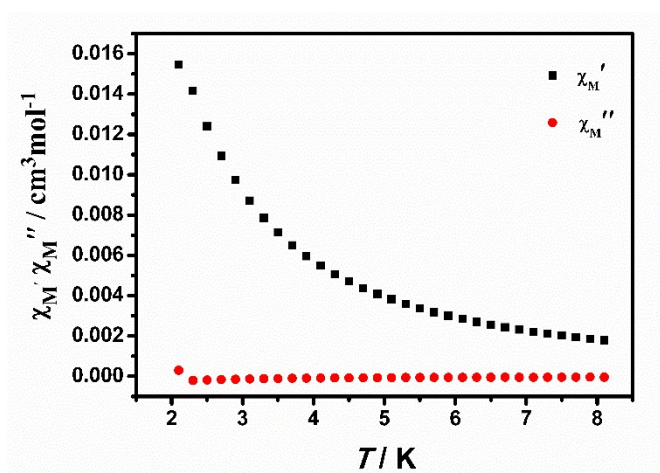

**Figure S4.** Temperature-dependent in-phase  $\chi'$  and out-of-phase  $\chi''$  ac susceptibility signals for **2** at the frequency of 999 Hz under zero dc field.
